# Supplementary material for: Design rules for highly transparent electrodes using dielectric constant matching of metal oxide with Ag film in optoelectronic devices
Source: Royal Society of Chemistry journal article supplement (doi:10.1039/c2cc35713e), 2012-01-01
Supplement: c2cc35713e.pdf [file c2cc35713e.pdf]

## Supplementary Information

### Design rules for highly transparent electrode using dielectric constant matching of metal oxide with Ag film in optoelectronic devices \*\*

*Kihyon Hong, Jun Ho Son, Sungjun Kim, Bon Hyeong Koo, and Jong-Lam Lee\**

#### Optical simulation

Optical simulation involving a multilayer structure is performed by using commercial software (The Essential Macleod, Thin Film Center, Inc.) based on what is known as the characteristic matrix method.<sup>1,2</sup> Providing the incidence medium and the emission medium is a half-infinite non-absorption medium, its characteristic matrix can be formulated as followed,

$$\begin{bmatrix} B \\ C \end{bmatrix} = \prod_{r=1}^k \begin{bmatrix} \cos \bar{\delta}_r & j \sin \bar{\delta}_r / \bar{\eta}_r \\ j \bar{\eta}_r \sin \bar{\delta}_r & \cos \bar{\delta}_r \end{bmatrix} \begin{bmatrix} 1 \\ \eta_{k+1} \end{bmatrix}$$

where B, C, and  $\delta$  are electrical field, magnetic field, and the phase thickness as follows:

$$\bar{\delta}_r = \frac{2\pi}{\lambda} N_r d_r \cos \bar{\theta}_r = \frac{2\pi}{\lambda} (n_r - jk_r) d_r \cos \bar{\theta}_r$$

and is the complex admittance in the horizontal and vertical directions, respectively, as follows:

$$\bar{\eta}_r = N_r \cos \bar{\theta}_r = (n_r - jk_r) \cos \bar{\theta}_r$$

So, the transmittance of the general multilayer film system is:

$$T = \frac{4\eta_0 \eta_{k+1}}{(\eta_0 B + C)(\eta_0 B - C)}$$

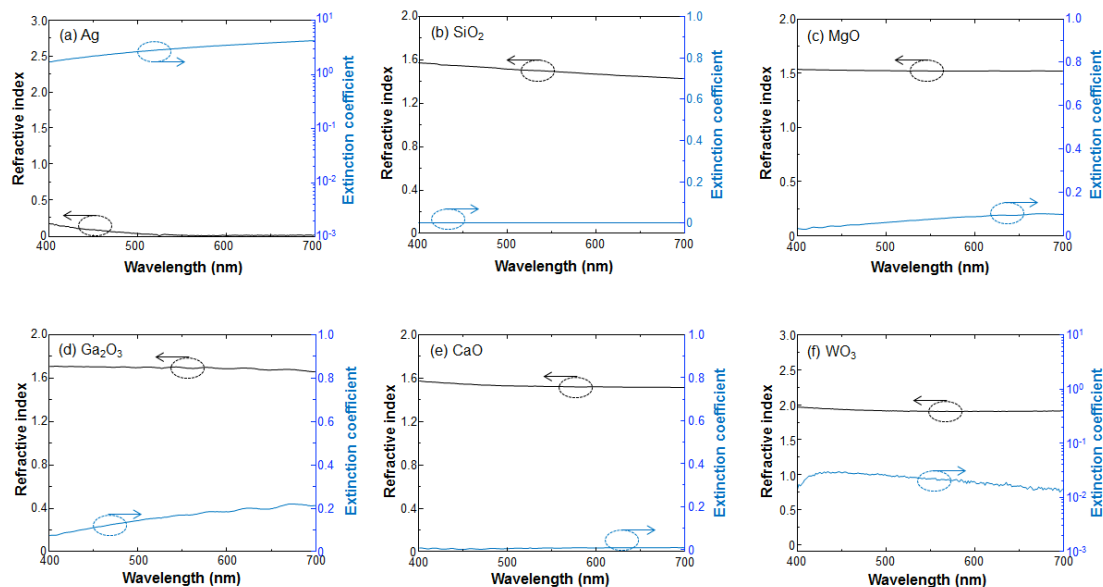

**Figure S1.** The optical constants (refractive index, extinction coefficient) of (a) Ag and (b)-(f) various metal oxides used for optical analysis.

Figure S1 shows the refractive index and extinction coefficient of Ag and various metal oxides as a function of wavelength. The optical constants were measured by using spectroscopy ellipsometry. These values were used for optical simulation.

### Frequency dependent relative permittivities of various kinds of metal oxide materials

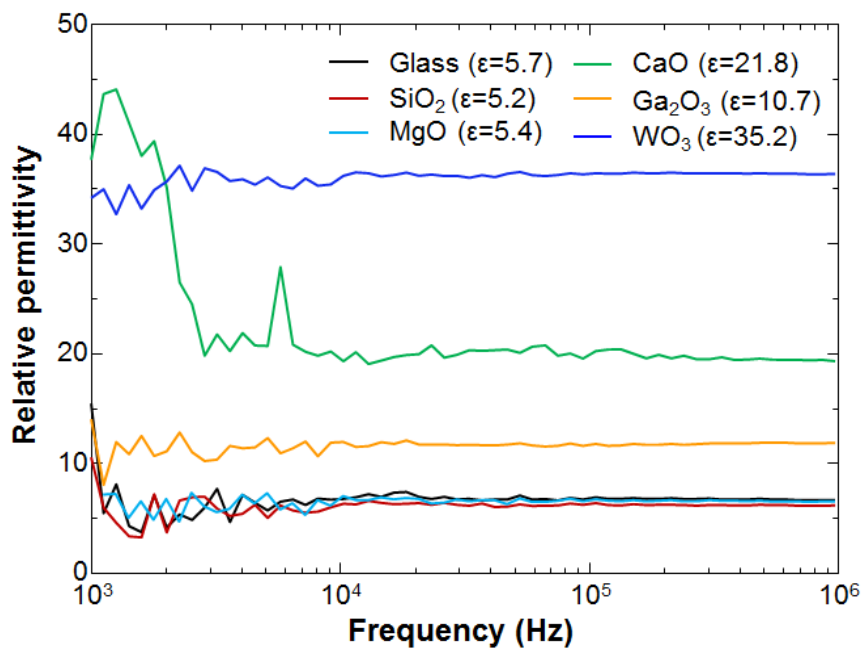

**Figure S2.** Measured relative permittivities for various kinds of metal oxides.

Figure S2 shows the measured relative permittivities ( $\epsilon$ ) for various kinds of metal oxides. The  $\text{WO}_3$ ,  $\text{CaO}$ , and  $\text{Ga}_2\text{O}_3$  showed relatively large values of 35.2, 21.8, and 10.7, respectively. In the meanwhile, the glass,  $\text{SiO}_2$ , and  $\text{MgO}$  showed relatively small values of 5.7, 5.2, and 5.4, respectively.

### Surface plasmons coupling and optical properties of MO/Ag and MO/Pt layers

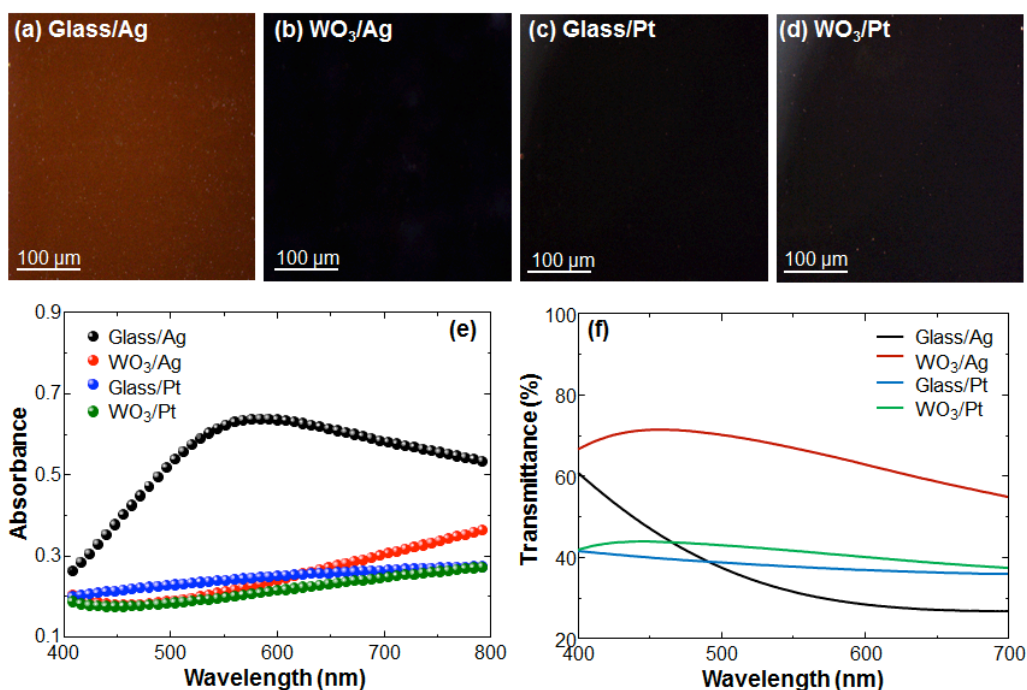

**Figure S3.** Dark field reflectance images of (a) glass/Ag, (b)  $\text{WO}_3/\text{Ag}$ , (c) glass/Pt, and (d)  $\text{WO}_3/\text{Pt}$  samples. (e) UV-vis absorbance spectra and (f) optical transmittance spectra of four kinds of samples.

To clarify the effect of plasmon frequency on SPs in metal films, we observed dark-field reflectance images of Ag-based double layers (glass/Ag and  $\text{WO}_3/\text{Ag}$ ) and Pt-based double layers (glass/Pt and  $\text{WO}_3/\text{Pt}$ ) (Figs. S3(a)-(d)). The brightness of dark-field images can be enhanced in the glass/Ag sample, due to the collection of the scattered light, via, SPs coupling. However, the  $\text{WO}_3/\text{Ag}$  sample showed relatively dark image (Fig. S2(b)) due to the large dielectric constant of  $\text{WO}_3$ .

In the meanwhile, both of glass/Pt and  $\text{WO}_3/\text{Pt}$  samples showed relatively dark images, irrelevant to dielectric layers underneath due to the small plasmon frequency (<2 eV) of Pt. In UV-visible absorbance spectra, glass/Ag sample showed broad peaks induced by SP absorption in the visible region which were not seen in the  $\text{WO}_3/\text{Ag}$  and Pt-based samples (Fig. S3(e)).

The measured transmittance spectra of glass/Ag sample showed low transmittance (< 50 %) in visible region (Fig. S3(f)). When we employed the WO<sub>3</sub> layer between glass and Ag layers, the WO<sub>3</sub>/Ag sample showed enhanced optical transmittance (~70 %). In the meanwhile, both of glass/Pt and WO<sub>3</sub>/Pt samples showed low optical transmittance due to the low plasmon frequency and large *k* value of Pt. These results indicate that the Ag has the plasmon frequency in visible range and we can control the SPs coupling and optical property of Ag-based films.

## References

- 1 E. G. Bortchagovsky and U. C. Fischer, *J. Chem. Phys.* 2002, 117, 5384.
- 2 H. A. Macleod, *Thin-film Optical Filters*. New York: Taylor & Francis, 2001.
